# Supplementary material for: Molecular Characterization of Hereditary Breast and Ovarian Cancer Patients from a Public Precision Medicine Service in the Southeast Brazilian Population
Source: Research Square preprint supplement (doi:10.21203/rs.3.rs-6457826/v1), 2025-05-30
Supplement: Supplementary file 1 [file e7899ab8ee328d9352abb37b.docx]

**Supplementary Material**

**Supplementary Table S1.** Information on the multigenic panel used

| **Gene** | **Number of amplicons** | **Target regions (bp)** |
| --- | --- | --- |
| *ATM* | 105 | 21,988 |
| *BARD1* | 24 | 5,180 |
| *BRCA1* | 47 | 10,030 |
| *BRCA2* | 76 | 16,213 |
| *CDH1* | 30 | 6,530 |
| *CHEK2* | 23 | 4,675 |
| *EPCAM* | 13 | 2,749 |
| *MLH1* | 23 | 4,989 |
| *MSH2* | 29 | 6,160 |
| *MSH6* | 29 | 6,154 |
| *NBN* | 26 | 5,337 |
| *NF1* | 102 | 21,062 |
| *PALB2* | 29 | 6,344 |
| *PTEN* | 21 | 4,056 |
| *RAD50* | 45 | 9,427 |
| *RAD51* | 10 | 12,261 |
| *RAD51B* | 17 | 3,536 |
| *RAD51C* | 16 | 3,231 |
| *RAD51D* | 17 | 3,373 |
| *SMARCA4* | 65 | 12,977 |
| *STK11* | 16 | 3,222 |
| *TP53* | 15 | 3,148 |

**Supplementary Table S2.** Data on the VUS-type variants found and their distribution across genes.

| **Gene** | **Variant (HGVS)** | **Variant ID** | **Number of patients** |
| --- | --- | --- | --- |
| *ATM* | c.1049C>T (p.Ala350Val) | rs587779139 | 1 |
| *ATM* | c.4148C>T | rs141087784 | 1 |
| *ATM* | c.5879T>A (p.Ile1960Asn) | rs587782503 | 1 |
| *ATM* | c.6482G>A (p.Arg2161His) | rs756626462 | 1 |
| *ATM* | c.7375C>G (p.Arg2459Gly) | rs730881383 | 1 |
| *ATM* | c.7552C>T (p.Pro2518Ser) | rs374876799 | 1 |
| *ATM* | c.8560C>T (p.Arg2854Cys) | rs201958469 | 1 |
| *ATR* | c.5303A>G (p.Asp1768Gly) | rs763130593 | 1 |
| *BRCA1* | c.4417A>G | - | 1 |
| *BRCA2* | c.1096T>G (p.Leu366Val) | rs587779357 | 1 |
| *BRCA1* | c.4379G>A (p.Ser1460Ans) | rs397509167 | 1 |
| *BRCA2* | c.8351G>A (p.Arg2784Gln) | rs80359076 | 1 |
| *BRCA2* | c.9011A>G (p.Lys3004Arg) | rs587782779 | 1 |
| *BLM* | c.1934A>G (p.Gln645Arg) | rs377563699 | 1 |
| *CHEK2* | c.1032A>G (p.Ile344Met) | rs202051128 | 1 |
| *CHEK2* | c.320-5T>A | rs121908700 | 1 |
| *CTC1* | 2192G>A (p.Arg731Gln) | rs201891953 | 1 |
| *DIS3L2* | c.1989C>A (p.Asn663Lys) | rs748211963 | 1 |
| *EGFR* | c.2885G>A (p.Arg962His) | rs144496976 | 1 |
| *ERCC1* | c.619C>T (p.Arg207Trp) | - | 1 |
| *FAN1* | c.2683T>A | - | 1 |
| *FANCD2* | c.1135-4A>G | rs760649828 | 1 |
| *FANCL* | c.1090_1099dup (p.Thr367fs) | - | 1 |
| *FANCL* | c.27G>C (p.Leu9Phe) | rs370409722 | 1 |
| *FANCM* | c.1667A>G (p.Asp556Gly) | rs148810507 | 1 |
| *MRE11* | c.476T>C (p.Val159Ala) | rs140130291 | 1 |
| *MSH2* | c.2111T>C (p.Ile704Thr) | rs564657106 | 1 |
| *MSH6* | c.3727A>T (p.Thr1234Ser) | - | 1 |
| *NF1* | c.169G>A (p.Gly57Ser) | rs779727341 | 1 |
| *NF1* | c.467G>T (p.Arg156Leu) | rs754096545 | 2 |
| *PMS2* | c.2182_2184delinsG (p.Thr728Alafs) | rs1554294508 | 1 |
| *POLE* | c.6775C>T (p.Arg2259Trp) | rs866548835; | 1 |
| *PTCH1* | c.4163G>C (p.Gly1388Ala) | - | 1 |
| *RAD50* | c.886G>A (p.Val296Ile) | rs876658219 | 1 |
| *RECQL4* | c.217C>G | - | 1 |
| *RECQL4* | c.1151G>A (p.Arg384Gln) | rs376045624 | 1 |
